# Supplementary material for: Robotic versus Laparoscopic Liver Resections for Colorectal Metastases: A Systematic Review and Meta-Analysis
Source: MDPI journal article supplement (doi:10.3390/cancers16081596), 2024-04-22
Supplement: s1 [file s1]

# **Robotic versus Laparoscopic Liver Resections for Colorectal Metastases:**

## **A Systematic Review and Meta-Analysis**

### **Supplementary Digital File**

#### **CONTENT:**

|                                                                                                                                                                                                                                                                                                         |          |
|---------------------------------------------------------------------------------------------------------------------------------------------------------------------------------------------------------------------------------------------------------------------------------------------------------|----------|
| <b>Figure S1. A summary table of review authors' judgements for each risk of bias item for randomized study. ....</b>                                                                                                                                                                                   | <b>2</b> |
| <b>Figure S2. A summary table of review authors' judgements for each risk of bias item for non randomized trials. ....</b>                                                                                                                                                                              | <b>2</b> |
| <b>Figure S3: A plot of the distribution of review authors' judgements across non randomized studies for each risk of bias item .....</b>                                                                                                                                                               | <b>3</b> |
| <b>Figure S4: Forest plot of mortality in different follow-up periods among LLR and RLR groups. The center of each square represents the odds ratios for individual trials, and the corresponding horizontal line stands for a 95% confidence interval. The diamonds represent pooled results. ....</b> | <b>3</b> |

|       |                                                                                                                                                                                                                                                             | Risk of bias domains |    |    |    |    |                  |
|-------|-------------------------------------------------------------------------------------------------------------------------------------------------------------------------------------------------------------------------------------------------------------|----------------------|----|----|----|----|------------------|
|       |                                                                                                                                                                                                                                                             | D1                   | D2 | D3 | D4 | D5 | Overall          |
| Study | Li et al. 2022                                                                                                                                                                                                                                              |                      |    |    |    |    |                  |
|       | Domains:<br>D1: Bias arising from the randomization process.<br>D2: Bias due to deviations from intended intervention.<br>D3: Bias due to missing outcome data.<br>D4: Bias in measurement of the outcome.<br>D5: Bias in selection of the reported result. |                      |    |    |    |    | Judgement<br>Low |

**Figure S1.** A summary table of review authors' judgements for each risk of bias item for randomized study.

|       |                      | Risk of bias domains                                                                                                                                                                                                                                                                                                        |    |    |    |    |    |                              |         |
|-------|----------------------|-----------------------------------------------------------------------------------------------------------------------------------------------------------------------------------------------------------------------------------------------------------------------------------------------------------------------------|----|----|----|----|----|------------------------------|---------|
|       |                      | D1                                                                                                                                                                                                                                                                                                                          | D2 | D3 | D4 | D5 | D6 | D7                           | Overall |
| Study | Balzano et al. 2023  |                                                                                                                                                                                                                                                                                                                             |    |    |    |    |    |                              |         |
|       | Beard et al. 2020    |                                                                                                                                                                                                                                                                                                                             |    |    |    |    |    |                              |         |
|       | Cheung et al. 2023   |                                                                                                                                                                                                                                                                                                                             |    |    |    |    |    |                              |         |
|       | Gumbs et al. 2022    |                                                                                                                                                                                                                                                                                                                             |    |    |    |    |    |                              |         |
|       | Gumbs et al. 2022b   |                                                                                                                                                                                                                                                                                                                             |    |    |    |    |    |                              |         |
|       | Masetti et al. 2022  |                                                                                                                                                                                                                                                                                                                             |    |    |    |    |    |                              |         |
|       | Radomski et al. 2023 |                                                                                                                                                                                                                                                                                                                             |    |    |    |    |    |                              |         |
|       | Rahimli et al. 2020  |                                                                                                                                                                                                                                                                                                                             |    |    |    |    |    |                              |         |
|       |                      | Domains:<br>D1: Bias due to confounding.<br>D2: Bias due to selection of participants.<br>D3: Bias in classification of interventions.<br>D4: Bias due to deviations from intended interventions.<br>D5: Bias due to missing data.<br>D6: Bias in measurement of outcomes.<br>D7: Bias in selection of the reported result. |    |    |    |    |    | Judgement<br>Moderate<br>Low |         |

**Figure S2.** A summary table of review authors' judgements for each risk of bias item for non randomized trials.

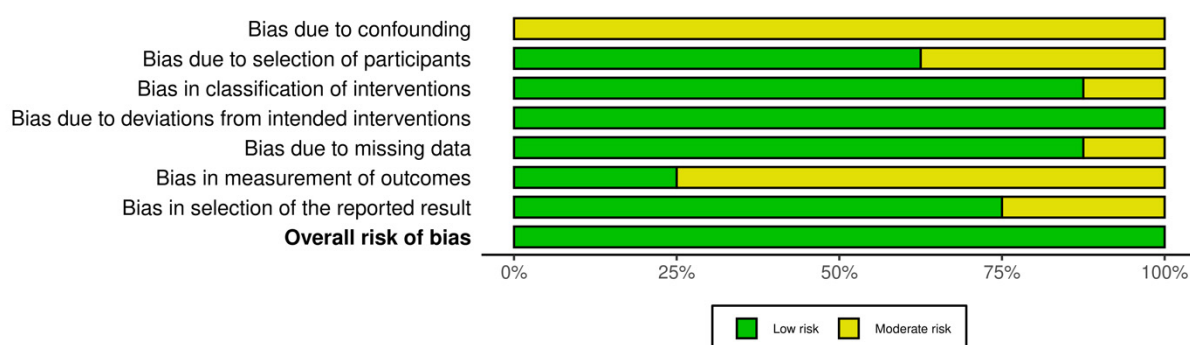

**Figure S3.** A plot of the distribution of review authors' judgements across non randomized studies for each risk of bias item.

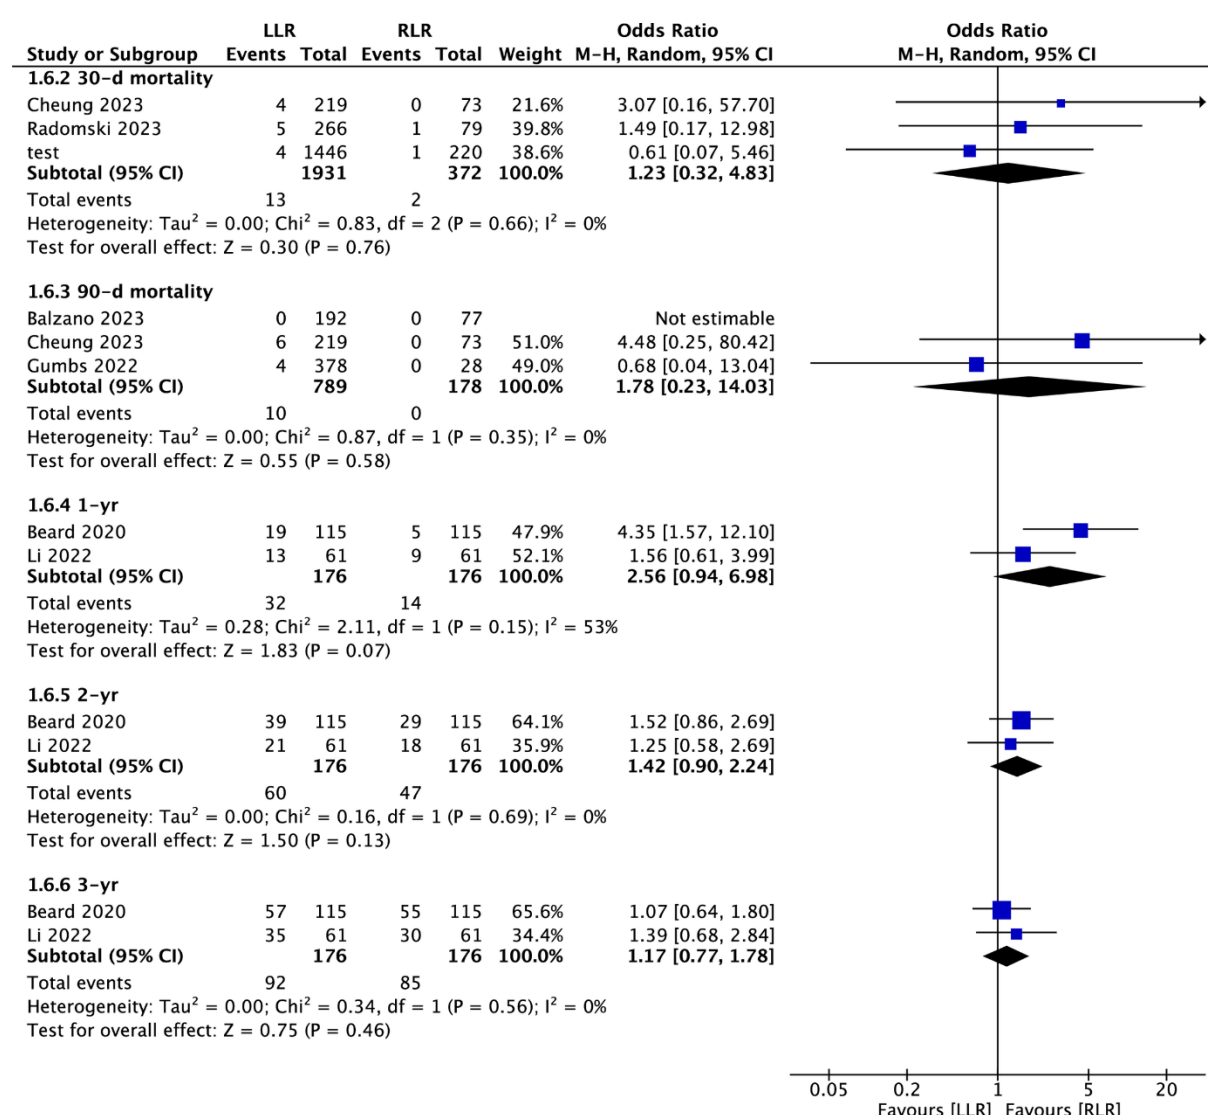

**Figure S4.** Forest plot of mortality in different follow-up periods among LLR and RLR groups. The center of each square represents the odds ratios for individual trials, and the corresponding horizontal line stands for a 95% confidence interval. The diamonds represent pooled results.
